# Supplementary material for: Toward hyper-resolution global hydrological models including human activities: application to Kyushu Island, Japan
Source: Copernicus journal article supplement (doi:10.5194/hess-2021-484), 2021-09-28
Supplement: Supplementary file [file hess-2021-484-AC2-supplement.pdf]

Dear Reviewer 1,

Thank you very much for taking the time to review our manuscript.

Best regards,

Naota Hanasaki (on behalf of authors)

The paper is very well written.

Thank you for your positive evaluation to this paper.
